# Supplementary material
Source: ML conference proceedings conference paper supplement (https://proceedings.neurips.cc/paper_files/paper/2023/hash/3380e8116452e0efbf36f35d95e88c94-Abstract.html)
Supplement: Supplementary file 1 [file 3380e8116452e0efbf36f35d95e88c94-Supplemental-Conference.zip]

Archive with 4 entries (4 files):
- neurips2023-future-dependent-ope-main.zip
- __MACOSX/._neurips2023-future-dependent-ope-main.zip
- sup_text.pdf
- __MACOSX/._sup_text.pdf
